# Supplementary material
Source: PubMed Central journal article supplement (PMC4286166)

# Human Milk Glycomics and Gut Microbial Genomics in Infant Feces

## Shows Correlation between Human Milk Oligosaccharides and Gut Microbiota: A Proof-of-Concept Study

Maria Lorna A. De Leoz, Karen M. Kalanetra, Nicholas A. Bokulich, John S. Strum,  
Mark A. Underwood, J. Bruce German, David A. Mills, and Carlito B. Lebrilla

### Supporting Information for Publication

**Supplementary Table 1.** qPCR Primers and Probes.

| Primer/Probe | Taxonomy                     | Assay      | Sequence (5' to 3')                     | Concentration | Tm (C°) | Reference                    |
|--------------|------------------------------|------------|-----------------------------------------|---------------|---------|------------------------------|
| Uni334F      | universal Bacteria           | SYBR Green | ACTCCTACGGGAGGCAGCAGT                   | 400 nM        | 65.5    | Hartman <i>et al.</i> , 2009 |
| Uni514R      | universal Bacteria           | SYBR Green | ATTACCGCGGCTGCTGGC                      | 400 nM        | 65.5    | Hartman <i>et al.</i> , 2009 |
| Bdes1038F    | <i>Bacteroidales</i>         | SYBR Green | GGTGTGCGGCTTAAGTGCCAT                   | 400 nM        | 61      | Hartman <i>et al.</i> , 2009 |
| Bdes1189R    | <i>Bacteroidales</i>         | SYBR Green | CGGAYGTAAGGGCCGTGC                      | 400 nM        | 61      | Hartman <i>et al.</i> , 2009 |
| Bif F        | <i>Bifidobacteria</i>        | TaqMan     | GCGTGCTTAACACATGCAAGTC                  | 300 nM        | 60      | Penders <i>et al.</i> , 2005 |
| Bif R        | <i>Bifidobacteria</i>        | TaqMan     | CACCCGTTTCCAGGAGCTATT                   | 300 nM        | 60      | Penders <i>et al.</i> , 2005 |
| Bif P        | <i>Bifidobacteria</i>        | TaqMan     | [6-FAM]TCACGCATTACTACCCGTTTCGCC[BHQ1]   | 150 nM        | 60      | Penders <i>et al.</i> , 2005 |
| BiLONF       | <i>B. longum</i> group       | TaqMan     | CAGTTGATCGCATGGTCTT                     | 500 nM        | 58      | Malinen <i>et al.</i> , 2005 |
| BiLONR       | <i>B. longum</i> group       | TaqMan     | TACCCGTCGAAGCCAC                        | 500 nM        | 58      | Malinen <i>et al.</i> , 2005 |
| BifSpP       | <i>B. longum</i> group       | TaqMan     | [6-FAM]TGGGATGGGGTTCGCGTCCTATCAG[TAMRA] | 80 nM         | 58      | Malinen <i>et al.</i> , 2005 |
| BiADOg-1a    | <i>B. adolescentis</i> group | SYBR Green | CTCCAGTTGGATGCATGTC                     | 250 nM        | 55      | Matsuki <i>et al.</i> , 2004 |
| BiADOg-1b    | <i>B. adolescentis</i> group | SYBR Green | TCCAGTTGACCGCATGGT                      | 250 nM        | 55      | Matsuki <i>et al.</i> , 2004 |
| BiADO-2      | <i>B. adolescentis</i> group | SYBR Green | CGAAGGCTTGCTCCCAGT                      | 250 nM        | 55      | Matsuki <i>et al.</i> , 2004 |
| BiBIF-1      | <i>B. bifidum</i>            | SYBR Green | CCACATGATCGCATGTGATTG                   | 250 nM        | 55      | Matsuki <i>et al.</i> , 2004 |
| BiBIF-2      | <i>B. bifidum</i>            | SYBR Green | CCGAAGGCTTGCTCCCAA                      | 250 nM        | 55      | Matsuki <i>et al.</i> , 2004 |
| BiBRE-1      | <i>B. breve</i>              | SYBR Green | CCGGATGCTCCATCACAC                      | 250 nM        | 55      | Matsuki <i>et al.</i> , 2004 |
| BiBRE-2      | <i>B. breve</i>              | SYBR Green | ACAAAGTGCCCTTGCTCCCT                    | 250 nM        | 55      | Matsuki <i>et al.</i> , 2004 |
| BiCATg-1     | <i>B. catenulatum</i> group  | SYBR Green | CGGATGCTCCGACTCCT                       | 250 nM        | 55      | Matsuki <i>et al.</i> , 2004 |
| BiCATg-2     | <i>B. catenulatum</i> group  | SYBR Green | CGAAGGCTTGCTCCCGAT                      | 250 nM        | 55      | Matsuki <i>et al.</i> , 2004 |

**Supplementary Figure 1.** H/D ratios of two isomeric groups of oligosaccharides in the fecal HMO profile of Infant B . H/D ratios were calculated using nano-HLPC chip/TOF MS data. (A) Four isomers of  $m/z$  856 ( $[M+H]^+$ ,  $z=1$ ,  $M=855.3220$ , second bar from the left in each week in Figure 4A). (B) Three isomers of  $m/z$  538 ( $[M+2H]^{2+}$ ,  $z=2$ ,  $M=1074.3963$ , fourth bar from the left in Figure 4A).  $M$ =monoisotopic (neutral) mass.

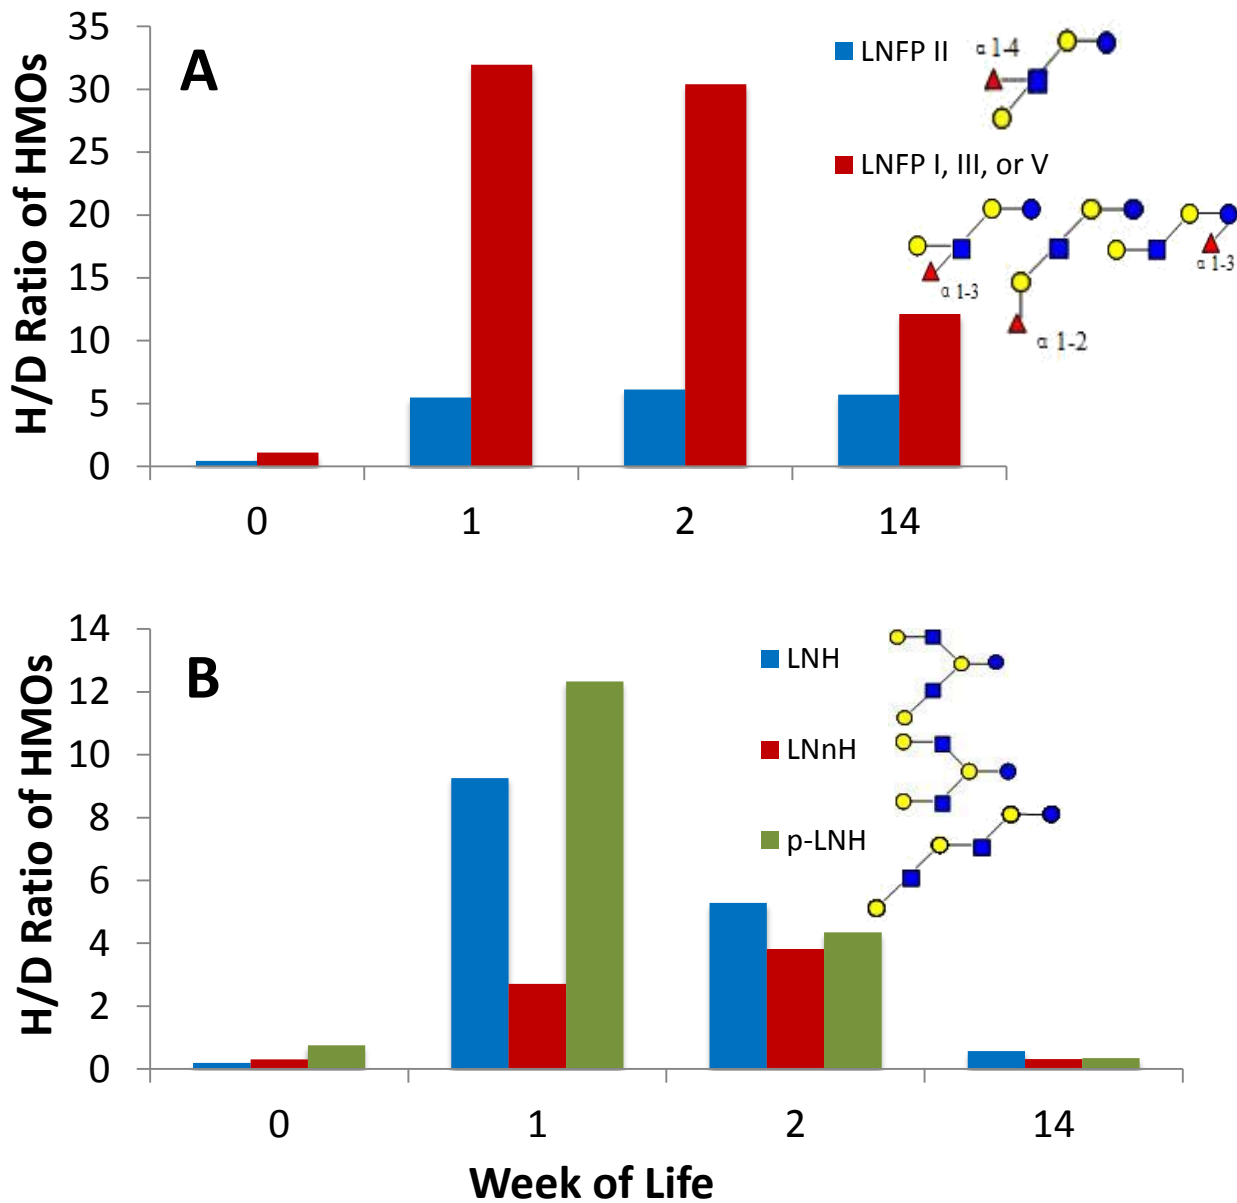

**Supplementary Figure 2.** LC/MS extracted ion chromatograms of  $m/z$  538 ( $[M+2H]^{2+}$ ,  $z=2$ ,  $M=1074.3963$ ) in the fecal HMO profile of Infant B using nano-HLPC chip/TOF MS. Chromatograms at (A) week 0, (B) week 1, (C) week 2, and (D) week 13. M=monoisotopic (neutral) mass.

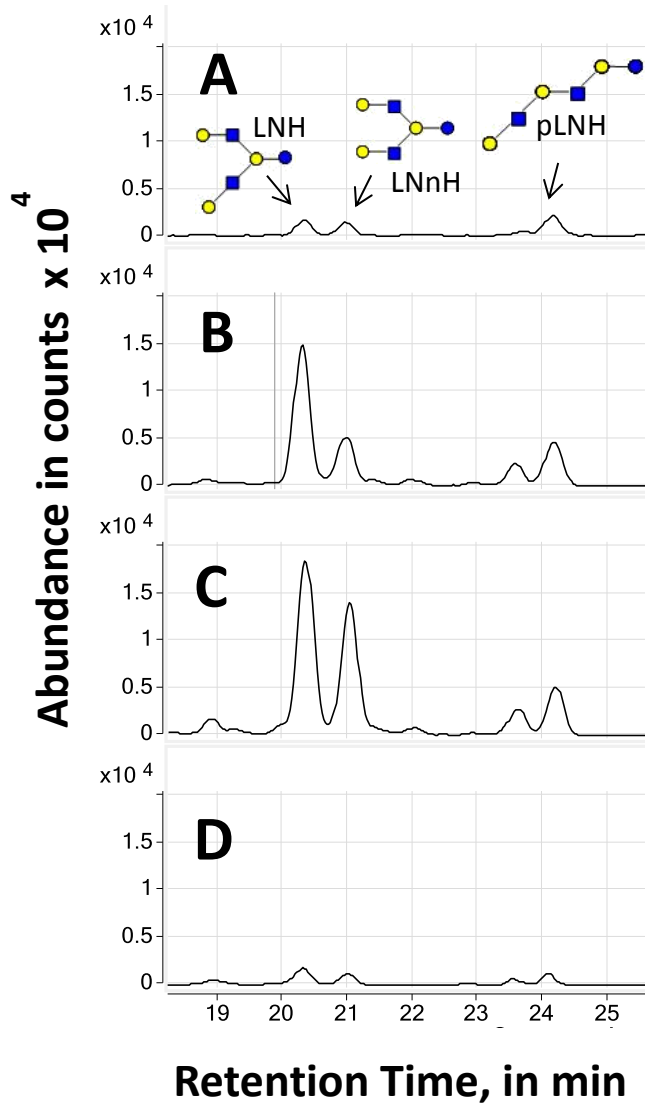

**Supplementary Figure 3.** H/D ratios of four isomeric groups of oligosaccharides in the fecal HMO profile of Infant B. H/D ratios were calculated using nano-HLPC chip/TOF MS data. (A) Five isomers of  $m/z$  611 ( $[M+2H]^{2+}$ ,  $z=2$ ,  $M=1220.4542$ , fifth bar from the left in each week in Figure 4A). (B) Three isomers of  $m/z$  684 ( $[M+2H]^{2+}$ ,  $z=2$ ,  $M=1366.5121$ , sixth bar from the left in Figure 4A). (C) Four isomers of  $m/z$  794 ( $[M+2H]^{2+}$ ,  $z=2$ ,  $M=1585.5864$ , ninth bar in Figure 4A). (D) Five isomers of  $m/z$  867 ( $[M+2H]^{2+}$ ,  $z=2$ ,  $M=1731.6443$ , tenth bar from the left in Figure 4A). M=monoisotopic (neutral) mass.

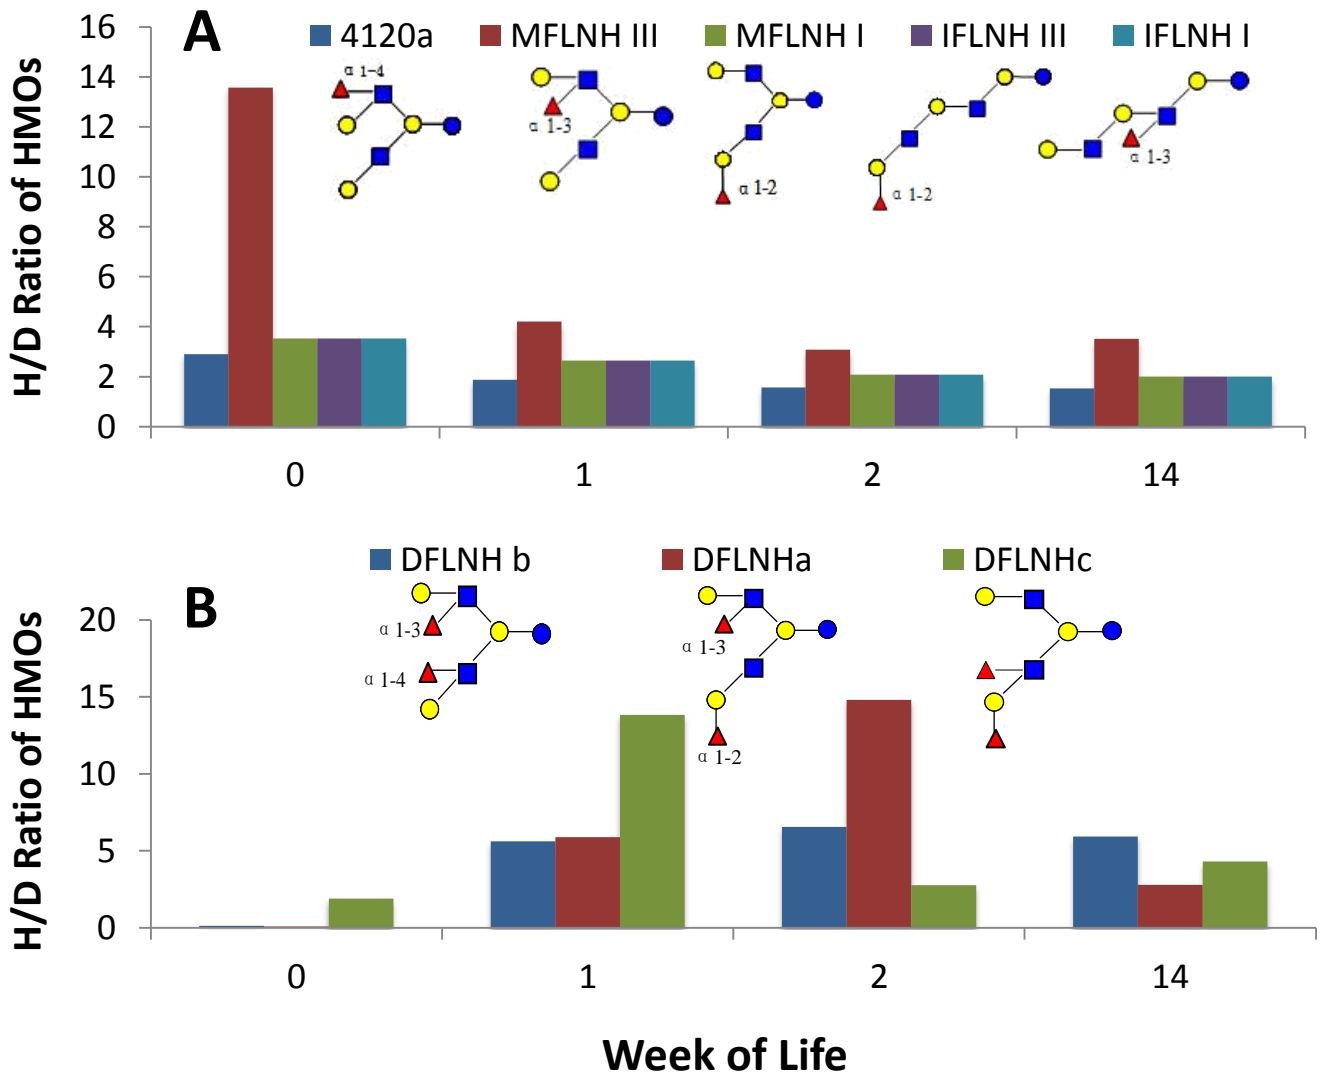

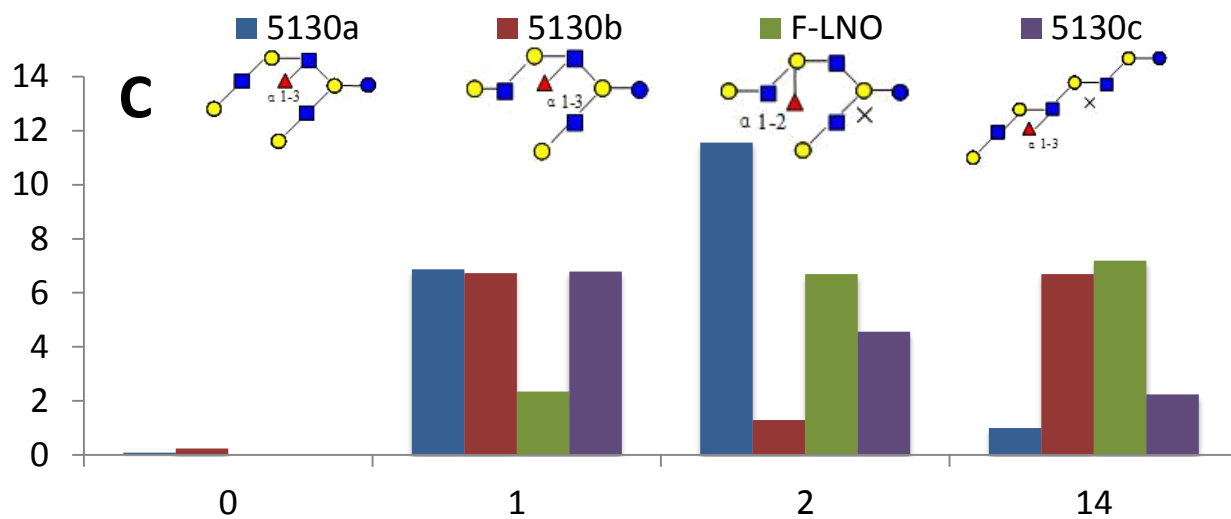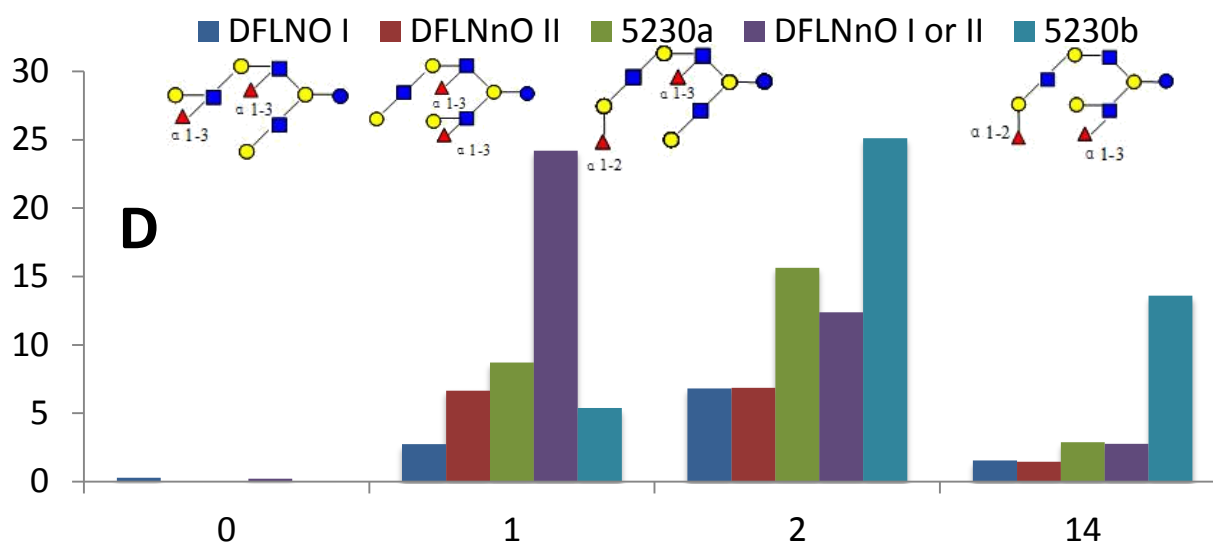

Supplement: pr500759e_si_001.pdf [file pr500759e_si_001.pdf]
